# Supplementary material for: New cellulose–silica composite IMAC/C18 for the selective enrichment of phosphorylated molecules and the improved recovery of hydrophilic species
Source: Royal Society of Chemistry journal article supplement (doi:10.1039/c4ra10254a), 2014-11-19
Supplement: c4ra10254a1.pdf [file c4ra10254a1.pdf]

*Supplementary Information*

**New Cellulose-Silica Composite IMAC/C18 for Selective Enrichment of  
Phosphorylated Molecules and Improved Recovery of Hydrophilic Species**

Muhammad Najam-ul-Haq<sup>1\*</sup>, Fahmida Jabeen<sup>1</sup>, Faiza Shafiq<sup>1</sup>, Salman Sajid<sup>1</sup>, Ambreen Saba<sup>1</sup>

<sup>1</sup>: Division of Analytical Chemistry, Institute of Chemical Sciences, Bahauddin Zakariya University, Multan 60800, Pakistan.

\* Corresponding Author

Dr. M. Najam-ul-Haq  
Institute of Chemical Sciences  
Bahauddin Zakariya University  
Multan 60800 Pakistan  
Tel.: +92 306 7552653  
Email: najamulhaq@bzu.edu.pk

**Keywords:** Cellulose-silica composite, Phosphopeptides, Phospholipids, Desalting, Prostate cancer, MALDI-MS.

## **Materials and Reagents**

The chemicals and reagent used in this study are given in the Supporting information. Silica gel 60 (pore size 60 Å, 200-425 mesh,  $\geq 98.5\%$ ), microgranular cellulose, (aminopropyl) trimethoxy silane (97%), iminodiacetic acid (IDA, 99%), octadecyl amine (ODA), potassium iodate ( $\text{KIO}_4$ ), sodium acetate trihydrate ( $\text{CH}_3\text{COONa}\cdot 3\text{H}_2\text{O}$ ), perchlorate ( $\text{HClO}_4$ ), phospholipid mixture from soyabean, Bovine  $\alpha$ -,  $\beta$ -casein, lysozyme, cytochrome c, myoglobin and BSA were purchased from Sigma-Aldrich. Ammonium hydroxide, acetic acid, toluene (99%), triethylamine (99.5%), dichloromethane, acetonitrile (ACN), were purchased from Fluka. Methanol ( $\geq 99.8\%$ ) was purchased from Merck. Ammonium hydrogen carbonate ( $\text{NH}_4\text{HCO}_3$ ), and trypsin were obtained from Sigma (St. Luis, MO, USA). Cyano-4-hydroxycinnamic acid (HCCA) was from Bruker Daltonics (Madison, WI, USA). Tetrahydrofuran (THF) and thionyl chloride were purchased from domestic supplier. Purified water was used for all the experiments.

## **Synthesis of Aminopropyl Bonded Silica**

One gram silica gel was suspended in 10 mL of anhydrous toluene; 1.5 mL silane reagent (trimethoxy-aminopropyl silane) was added into the suspension and mixture was refluxed for 10 h at 110 °C. The resulting product was washed with toluene, followed by dichloromethane and methanol-water (1:1). Derivatized silica was refluxed in methanol-water (1:1) for an hour at 70 °C to hydrolyze the un-reacted methoxy groups. Finally aminopropyl bonded silica (product A) was washed with methanol and dried under vacuum using rotary evaporator.

## **Selective Oxidation of Cellulose**

Three gram cellulose was stirred with 0.01 M, 300 mL aqueous solution of potassium iodate ( $\text{KIO}_4$ ) for 6 h at 25 °C, to form aldehyde group at  $\text{C}_2$ - $\text{C}_3$ . The resulting product was filtered and mixed with 0.2 M, 300 mL aqueous solution of sodium chlorite ( $\text{NaClO}_2$ ) which pH was

maintained at 6 using 0.1 M, 100 mL solution of  $\text{CH}_3\text{COOH}/\text{CH}_3\text{COONa}$  buffer in the ratio (1:18). The reaction mixture was stirred for 24 h at 25 °C. During this step chlorite (III) oxidized the aldehydes to carboxyl groups. Oxidized cellulose was refluxed in 10 mL dry thionyl chloride for 24 h at 76 °C. The unreacted thionyl chloride was vacuum distilled using rotary evaporator and the resulting brown solid (product B; cellulose acetyl chloride) was used, without air exposure, for further reaction.

### **Digestion of Standards and Biological Fluids**

One milligram of standard protein ( $\beta$ -casein) was suspended in 1 mL of deionized water. For protein mixture, 1 mg of each protein ( $\alpha$ -,  $\beta$ -casein, cytochrome c, lysozyme, myoglobin and BSA) was dissolved in 1 mg of deionized water. For non-fat milk and egg yolk, the lyophilized 1 mg powder was used and diluted with 1 mL of water. The resulting solution was aliquoted to 200  $\mu\text{L}$  fractions. In case of serum, 20  $\mu\text{L}$  was diluted with 1 M ammonium bicarbonate ( $\text{NH}_4\text{HCO}_3$ ) to the final volume of 200  $\mu\text{L}$ . 160  $\mu\text{L}$  of 1 M aqueous solution of ammonium bicarbonate ( $\text{NH}_4\text{HCO}_3$ ) and 50  $\mu\text{L}$  of 45 mM aqueous solution of dithiothreitol (DTT) were added to aliquot. The aliquot was incubated using a thermomixer at 56 °C for 15 min. The resulting solution was cooled to room temperature followed by the addition of 50  $\mu\text{L}$  of 100 mM aqueous solution of iodoacetamide. Subsequently, the solution was incubated for 15 min in dark at room temperature. 1400  $\mu\text{L}$  of de-ionized water was added in the solution followed by adding 2  $\mu\text{g}$  of trypsin (20  $\mu\text{L}$  of 0.1  $\mu\text{g}/\mu\text{L}$ ). Protein solution was digested on thermomixer for 14 h at 37 °C. Finally the tryptic digestion was stopped, by acidifying solution with 10  $\mu\text{L}$  of 1% trifluoroacetic acid (pH = 3). Protein digest was incubated for 5 min and stored at -20 °C.

### **Preparation of HeLa Cell Sample**

HeLa cells were cultured in high glucose Dulbecco's modified Eagle's medium, supplemented with 10% fetal bovine serum, 100 U/mL penicillin and 100 U/mL streptomycin. The cells were cultivated on 150 mm tissue culture plastic dishes at 37 °C in 5% CO<sub>2</sub> and 98% humidity. For total cell lysate preparation, cells were washed twice in ice cold PBS, harvested and centrifuged at 500xg for 4 min at 4 °C. Cells collected from 15 cm dish were re-suspended in 1 mL of lysis buffer (50 mM Tris-HCl, pH 8.0), 0.5% Triton X100, 150 mM NaCl, 5 mM MgCl<sub>2</sub>, 1 mM DTT, 10 mg/mL leupeptin, 10 mg/mL aprotinin and 1 mM PMSF. Lysis was performed for 30 min at 4 °C followed by the centrifugation at 16000xg for 10 min at 4°C. Protein concentration was determined using Coomassie Plus Protein Assay (Thermo Scientific).

### **For Selectivity/Sensitivity**

β-casein (1 μL) was spiked in de-phosphorylated cell extract (0.1 mL, 0.5 mL, 1 mL, 1.5 mL and 2 mL) to measure the selectivity of cellulose-silica IMAC composite. For sensitivity, 5 dilutions of β-casein were prepared in concentrations of 100, 50, 25, 10 and 1 femtomole. The calculations were cross checked by solution dilution calculator provided by Sigma Aldrich.

### **Mass Spectrometric Analysis**

The eluted content from RP was spotted on the MALDI target plate with 0.5 μL matrix solution (10 μg/μL α-cyano-4-hydroxy-cinnamic acid in 0.1% TFA: ACN, 1:1 v/v). For phosphopeptides, DHB buffer spiked with phosphoric acid was used. For phospholipids, gold nanoparticles with 0.1% TFA and carbon based LDI matrix strategy was applied. Ultraflex I (Bruker Daltonics) MALDI-TOF-MS in reflector mode was used to perform the mass spectrometric analysis. Mass spectra were recorded in the desired mass range. Validation of

all the data, including baseline subtraction, external calibration using Protein Standard I (Bruker Daltonics, Bremen, Germany) and all further data processing, were carried out by Flex analysis 3.3 software and the data acquisition by Flex control 3.0.

For serum analysis, mascot search engine was used with parameters as: taxonomy: Homo sapiens, Database: SwissProt, Enzyme: Trypsin, Allowed missed cleavage: 1, Fixed modification: Carboxymethyl (C), Variable modifications: Oxidation (M), Phospho (ST), Phospho (Y), monoisotopic, peptide mass tolerance: 150 ppm.

### 1. Oxidation of cellulose

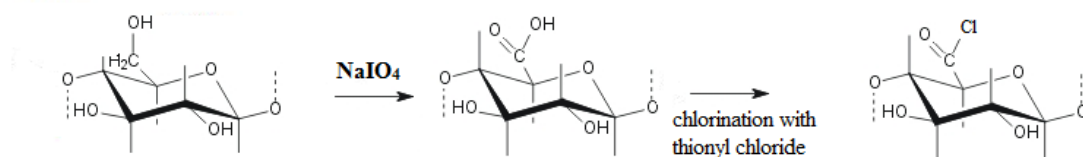

### 2. Amino modification of silica

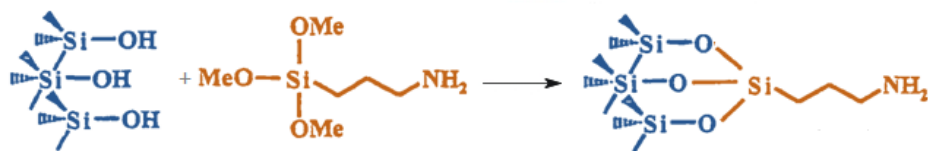

### 3. Synthesis of cellulose-silica composite

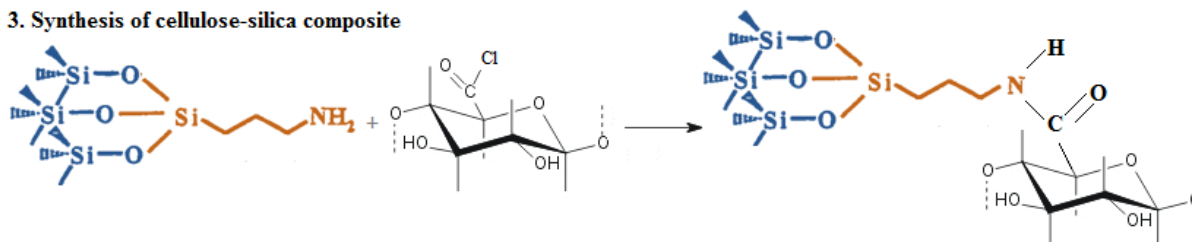

**Figure S1:** Schematic representation showing synthesis of cellulose-silica composite.

### 1. Oxidation of cellulose-silica composite

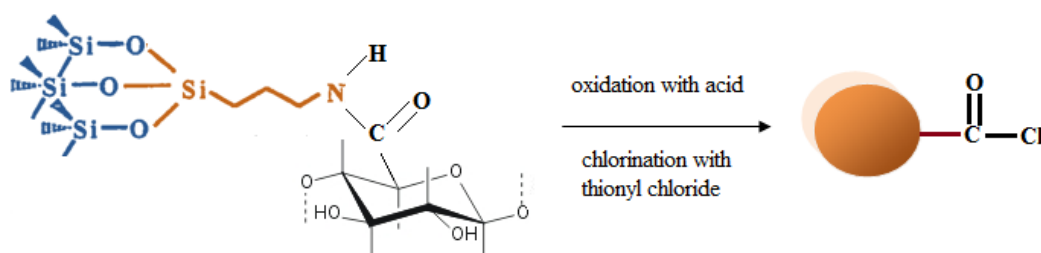

### 2. Derivatization of chlorinated cellulose-silica composite

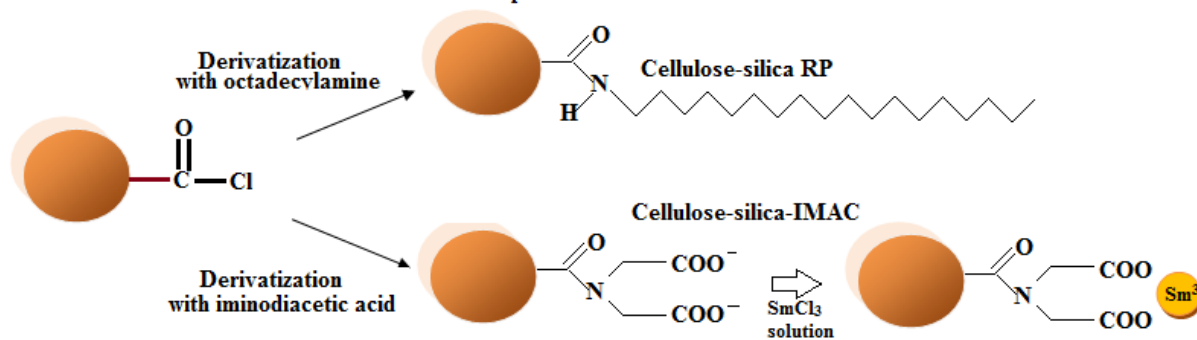

**Figure S2:** Schematic representation showing derivatization of cellulose-silica composite as IMAC and RP.

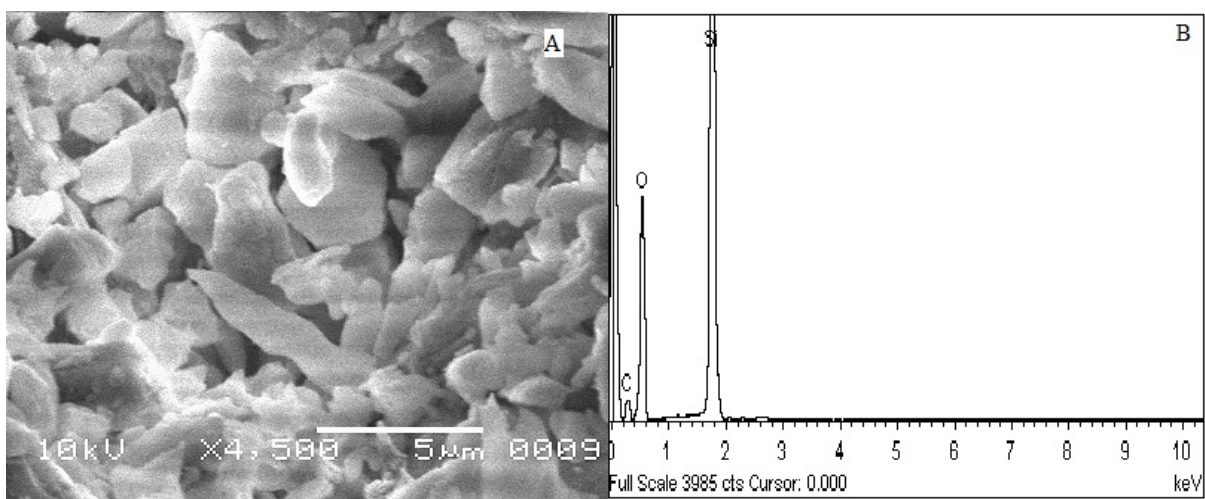

**Figure S3:** Characterisation of cellulose-silica composite; (A) morphology by SEM (b) elemental analysis by EDX.

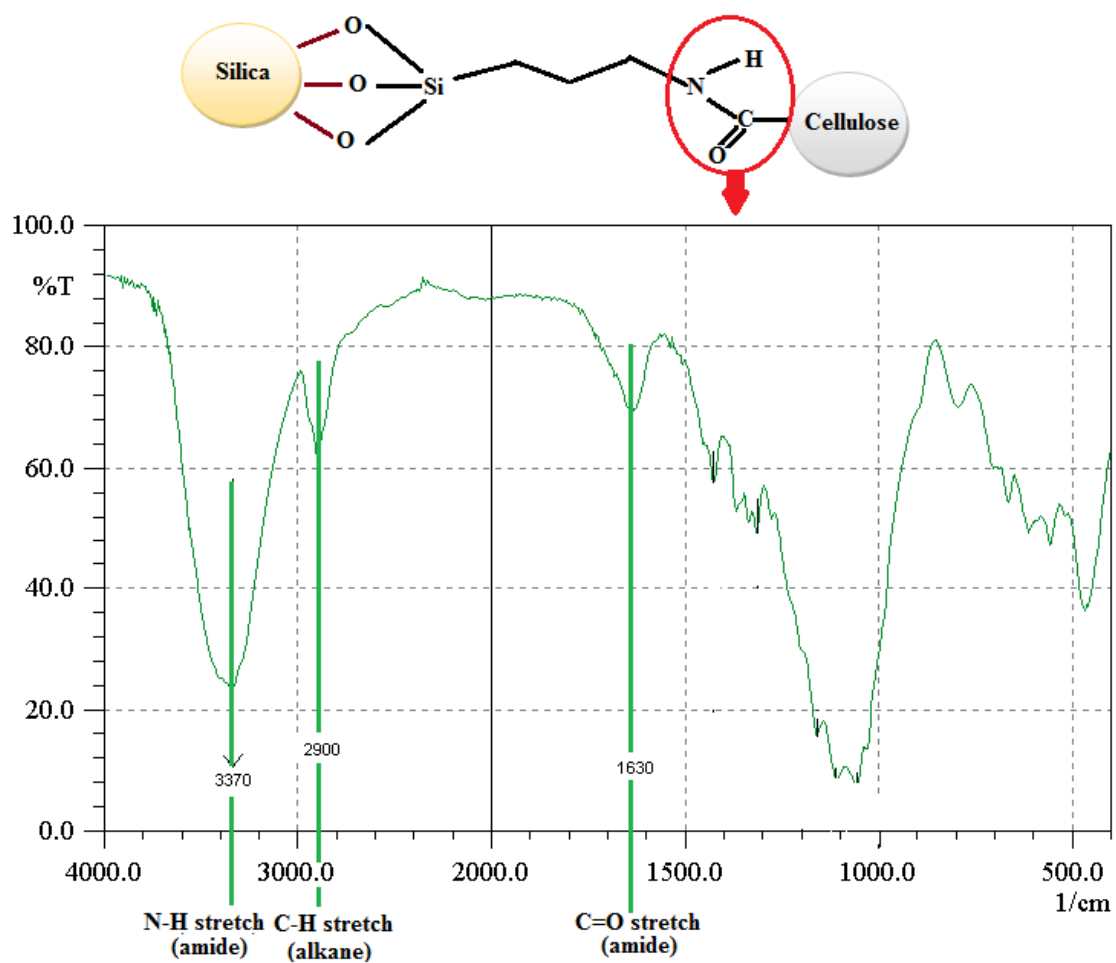

**Figure S4:** Synthesis of cellulose-silica composite through amide linkage. Pictorial illustration; FT-IR characterisation.

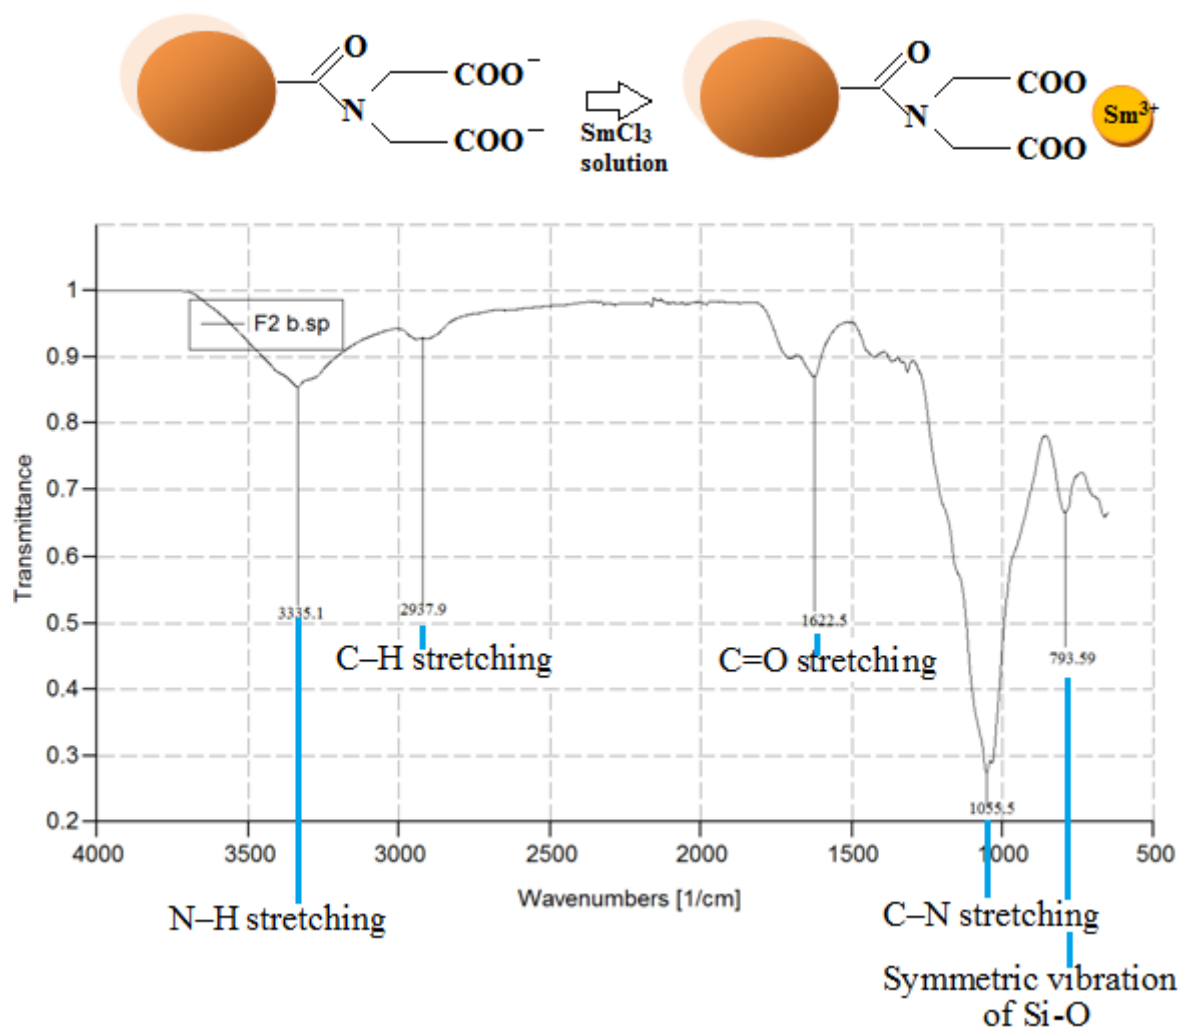

**Figure S5:** Functionalization of cellulose-silica composite as IMAC through iminodiacetic acid. Pictorial illustration; FT-IR characterisation.



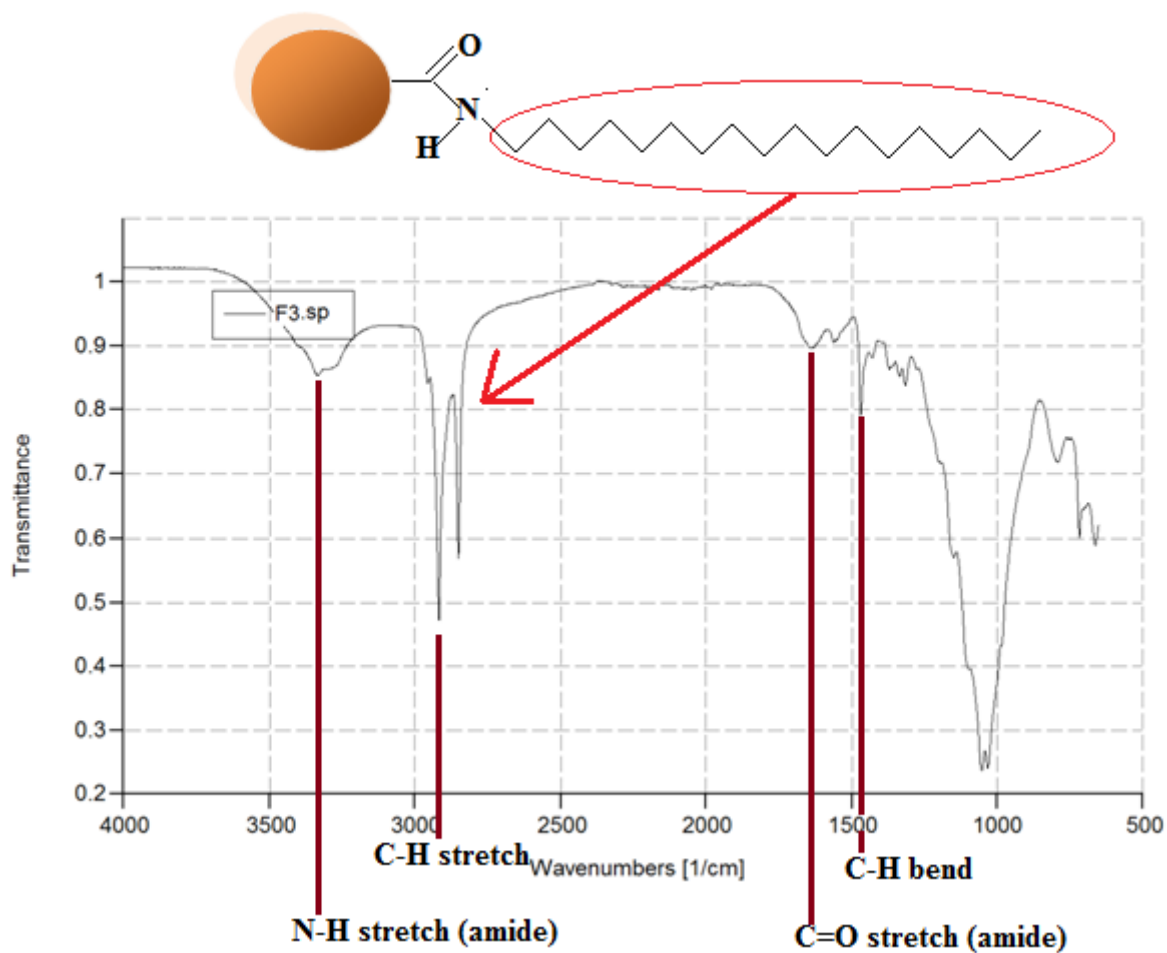

**Figure S6:** Cellulose-silica composite derivatized as reverse phase with octadecylamine: FT-IR characterisation.

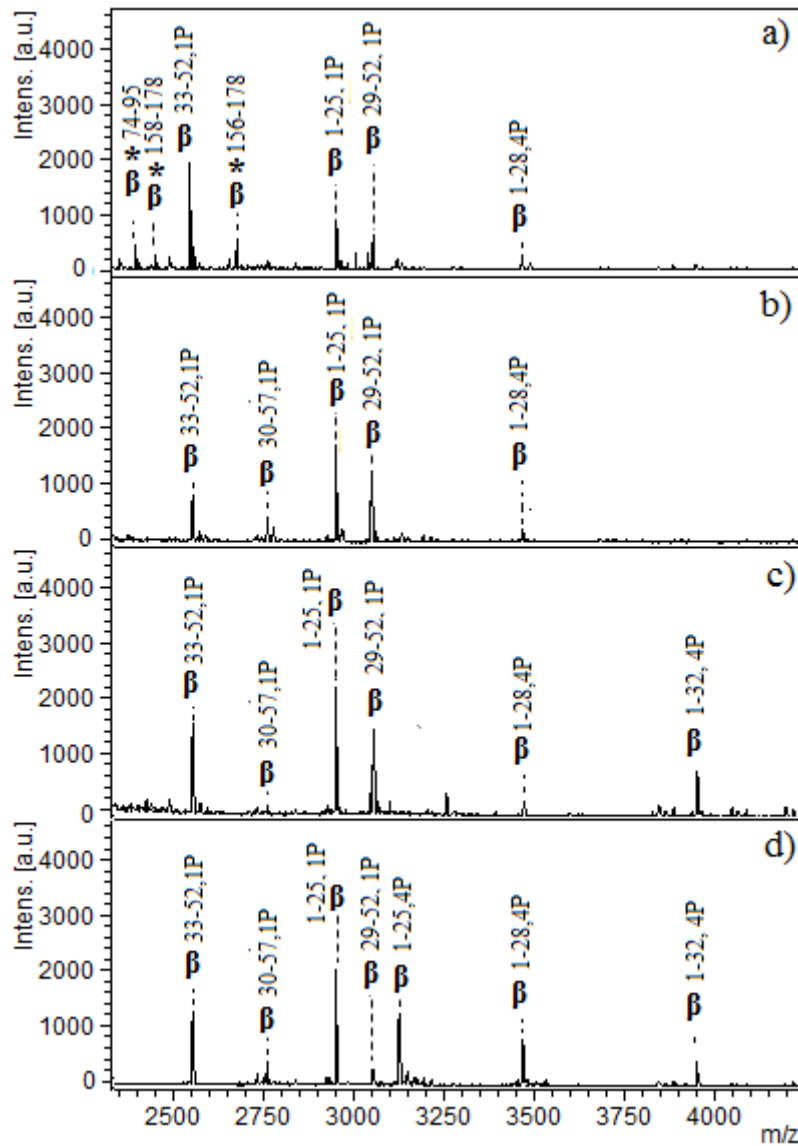

**Figure S7:** MALDI-MS spectra of tryptic  $\beta$ -casein digest using cellulose-silica-IMAC with immobilization of different metal ions; (a) eluted fraction of phosphopeptides from cellulose-silica-IMAC- $\text{Fe}^{3+}$  (b) eluted fraction of phosphopeptides from cellulose-silica-IMAC- $\text{Zr}^{4+}$  (c) eluted fraction of phosphopeptides from cellulose-silica-IMAC- $\text{La}^{3+}$  (d) eluted fraction of phosphopeptides from cellulose-silica-IMAC- $\text{Sm}^{3+}$ . The symbols  $\beta$  for phosphopeptides and  $\beta^*$  for non-phosphopeptides are derived from  $\beta$ -casein. Amino acid position and number of phosphate groups are also given with each m/z value.

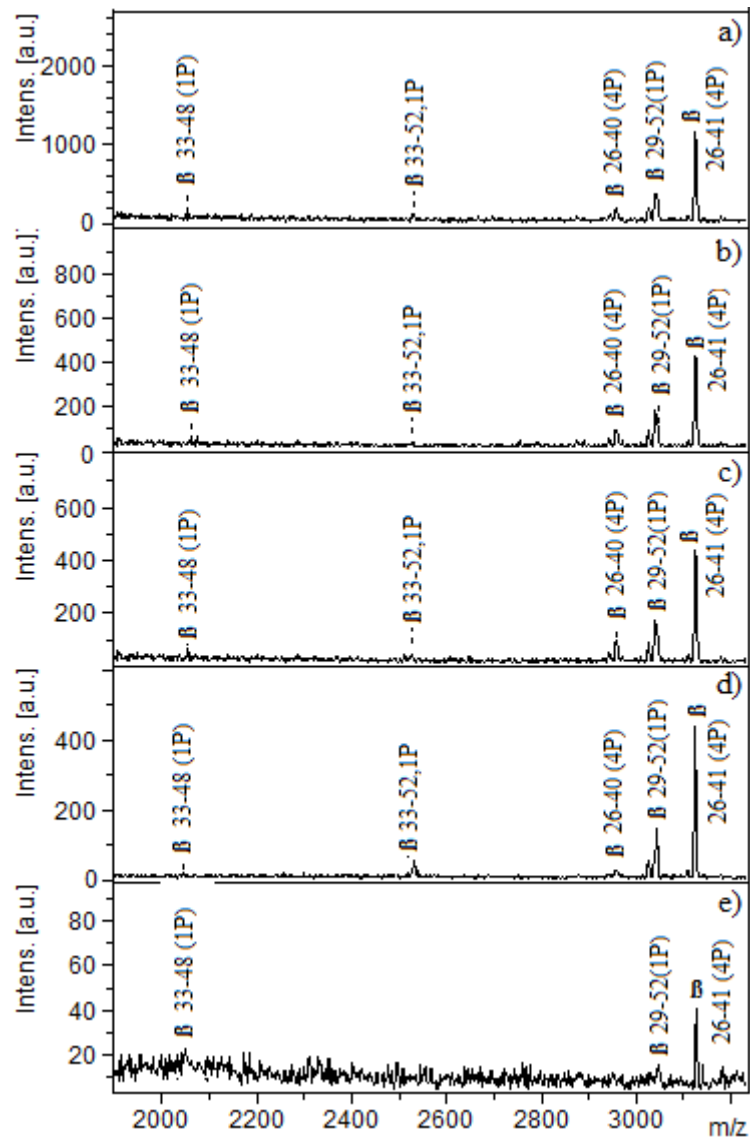

**Figure S8:** Sensitivity measurements for cellulose-silica-IMAC-Sm<sup>3+</sup> using dilutions of  $\beta$ -casein digest in concentrations as (a) 100 femtomole (b) 50 femtomole (c) 25 femtomole (d) 10 femtomole and (e) 1 femtomole. The symbols  $\beta$  is used to label phosphopeptide with position and number of phosphorylated serine.

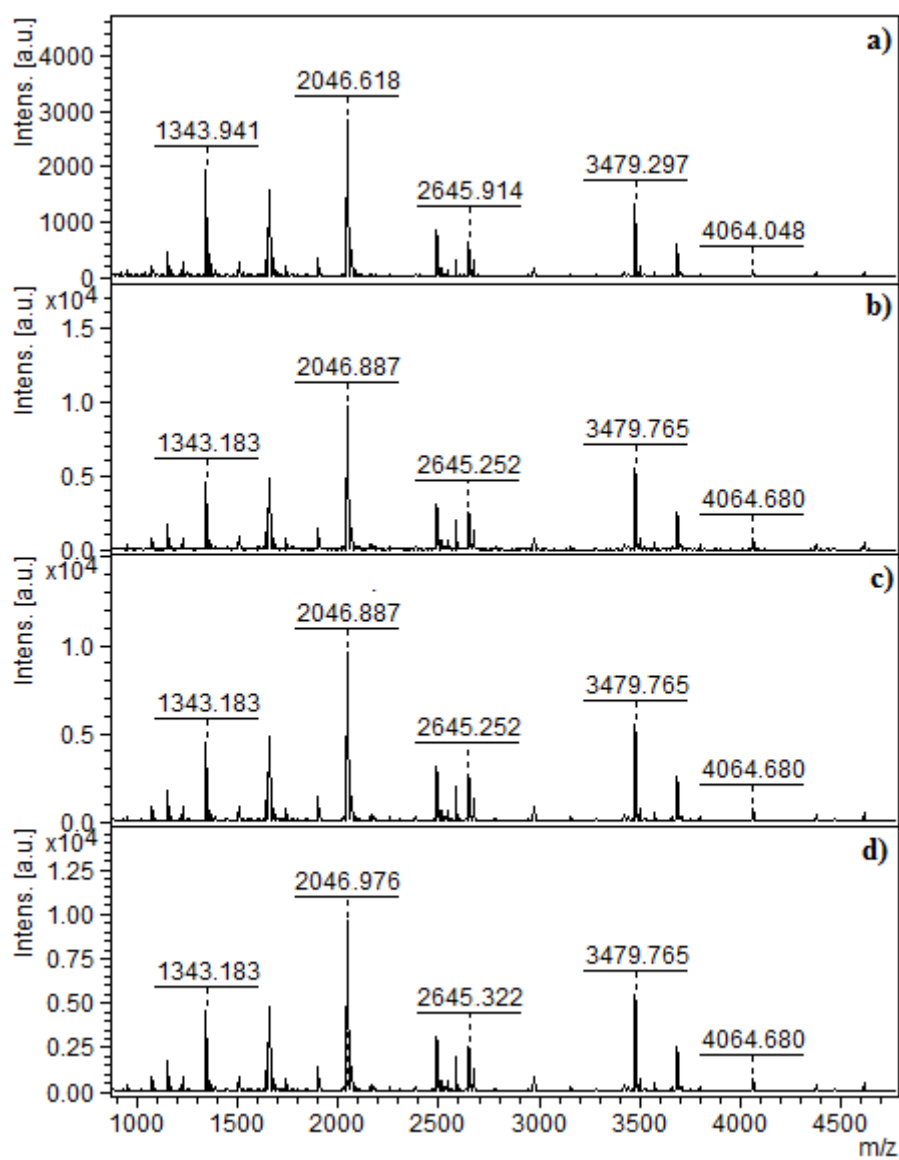

**Figure S9:** Method and material reproducibility using serum sample on cellulose-silica-IMAC-Sm<sup>3+</sup>.

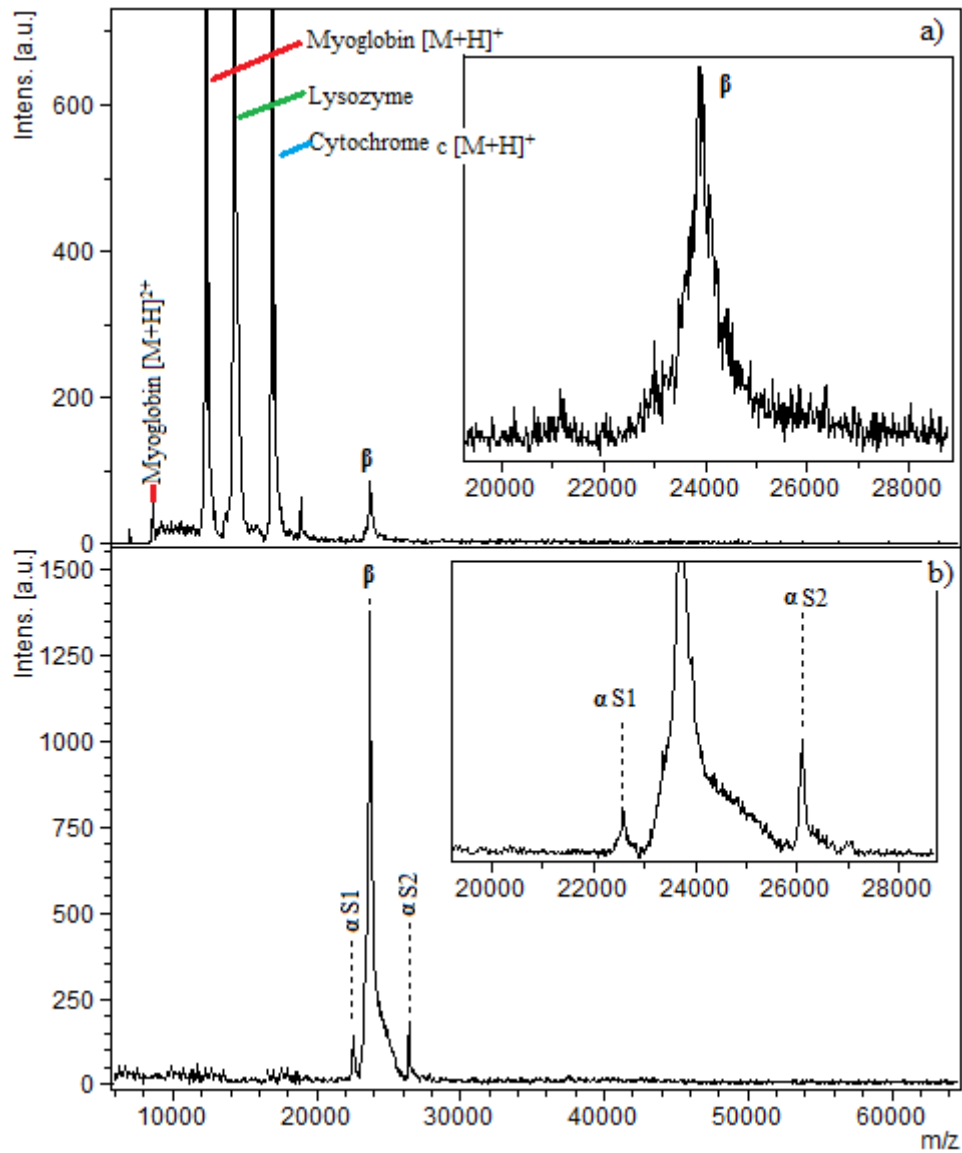

**Figure S10:** MALDI-MS spectra of enriched phosphoproteins ( $\alpha$ -casein,  $\alpha$ S1 at 24 kDa;  $\alpha$ S2 at 26 kDa and  $\beta$ -casein at 25 kDa) from protein mixture (containing lysozyme, cytochrome c, myoglobin and BSA) (a) before enrichment and (b) after enrichment on cellulose-silica-IMAC-Sm<sup>3+</sup>.

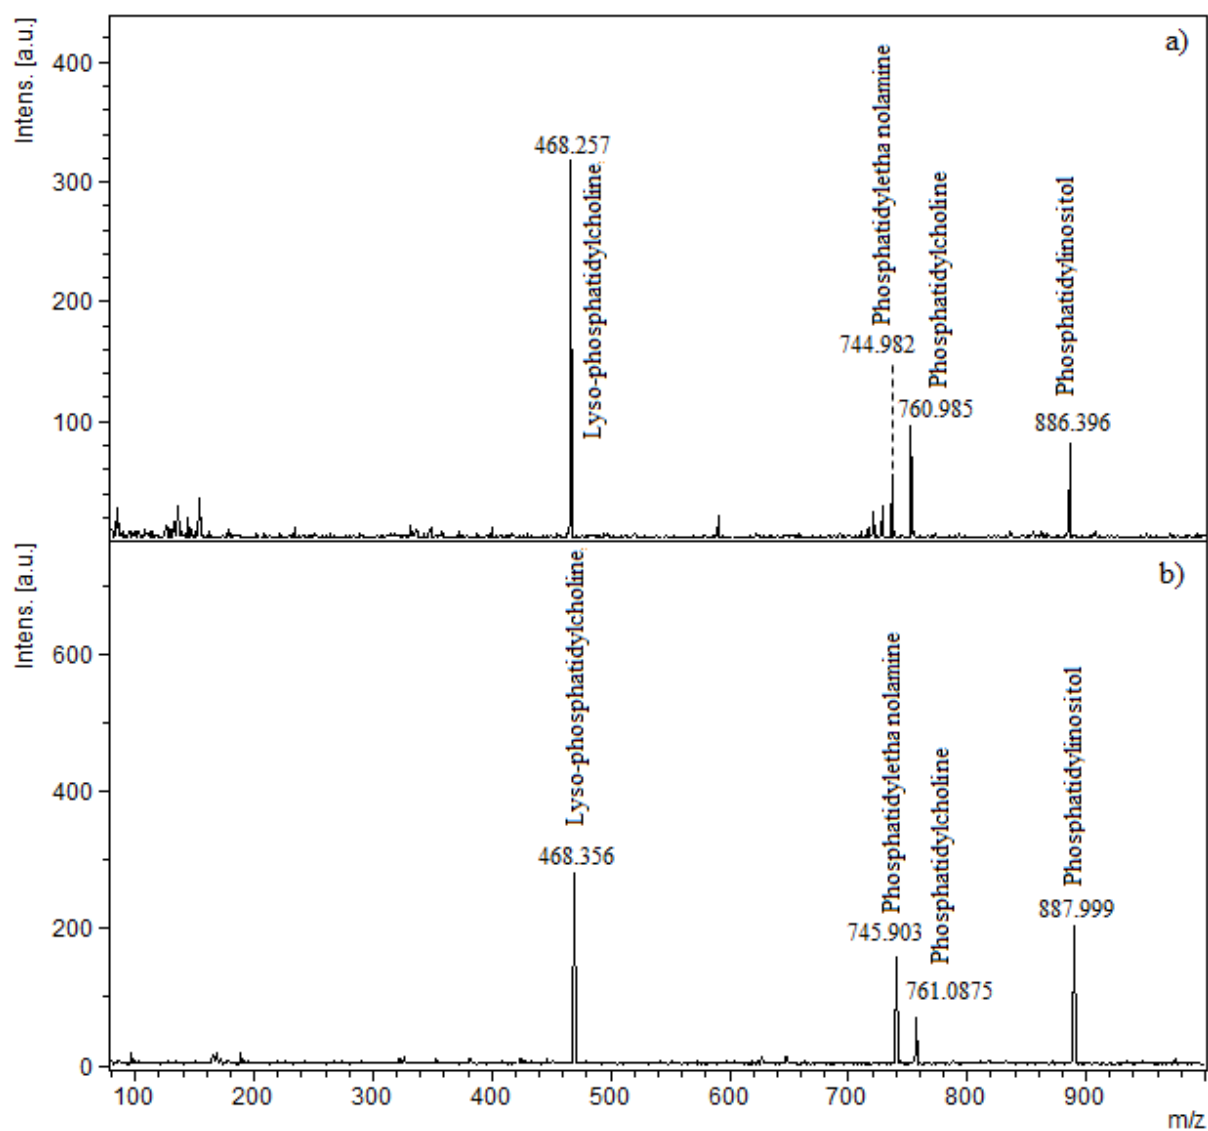

**Figure S11:** MALDI-MS spectra of phospholipid mixture (Sigma Aldrich) after enrichment on cellulose-silica-IMAC-Sm<sup>3+</sup> using (a) gold nanoparticles in 0.1% TFA as LDI matrix (b) carbon based LDI matrix.

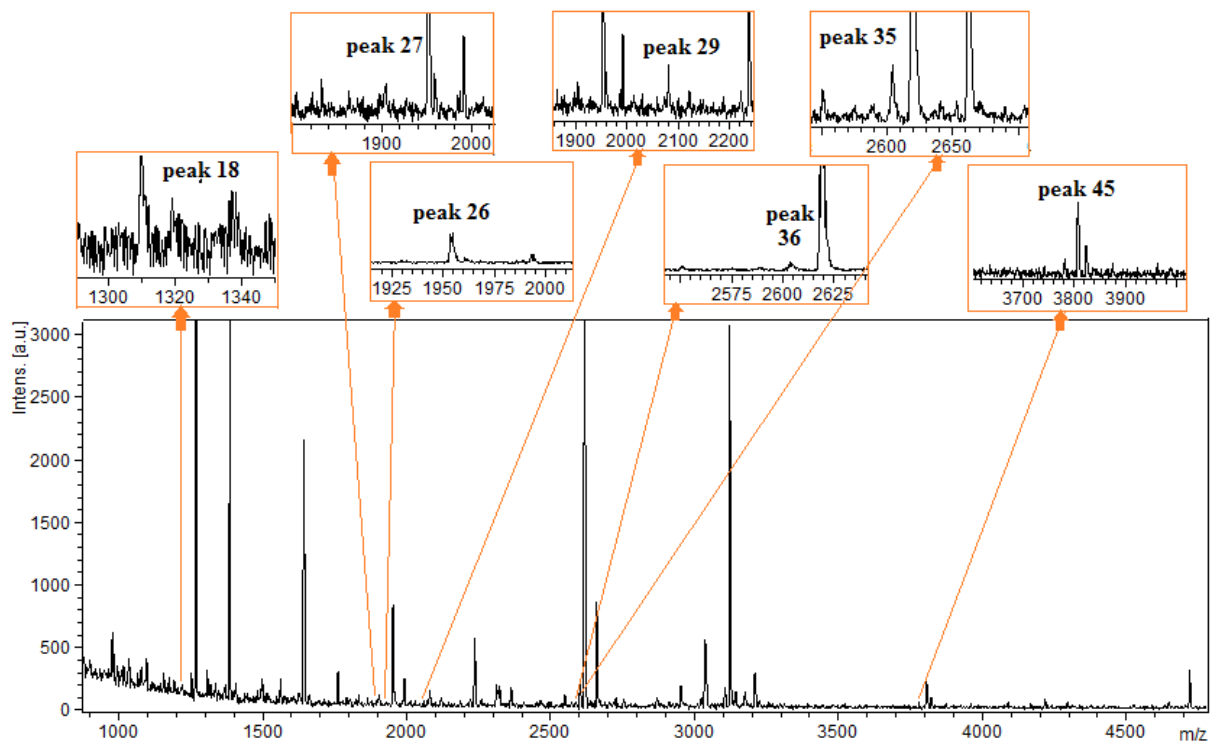

**Figure S12:** MALDI-MS analysis of serum phosphopeptides enriched by cellulose-silica-IMAC-Sm<sup>3+</sup>. Phosphopeptides related to prostate cancer are shown in inset.

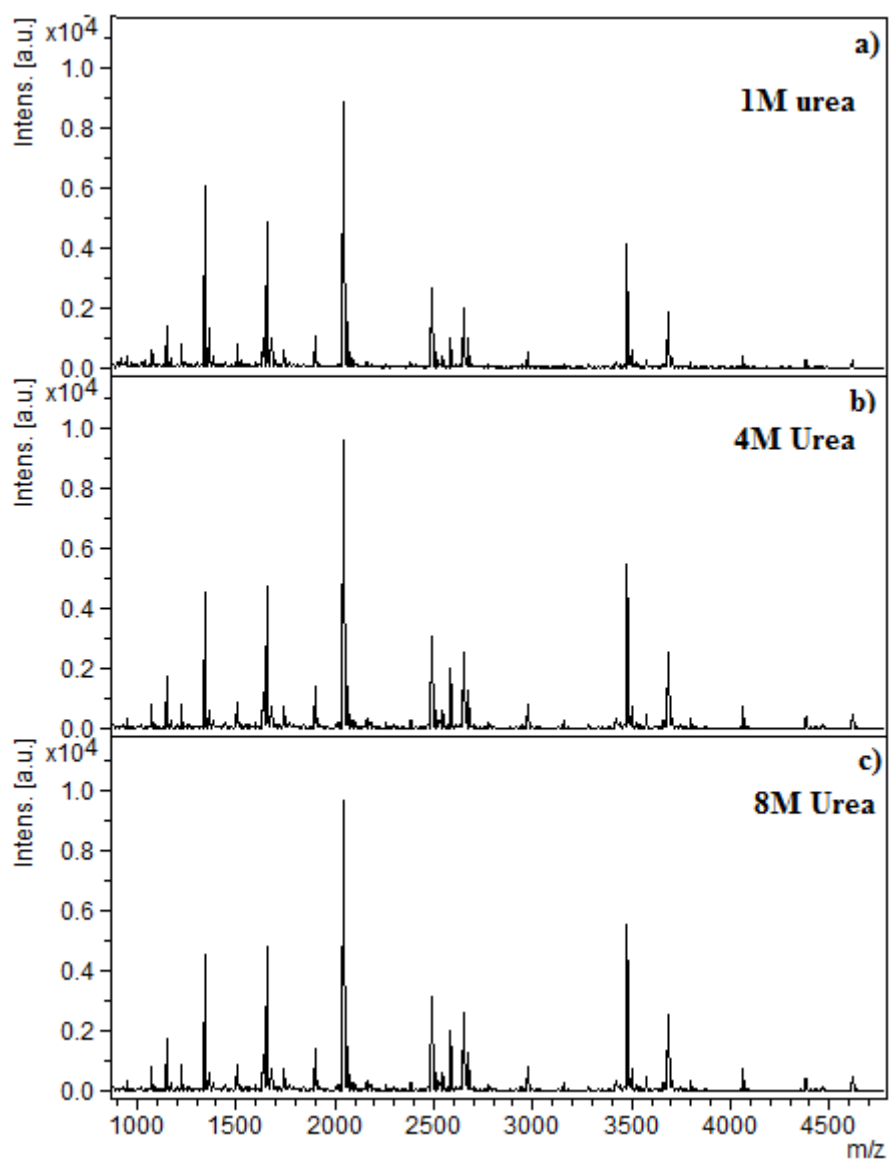

**Figure S13:** Desalting efficiency of cellulose-silica C18 for peptide mixture obtained as a result of tryptic digestion of  $\alpha$ -,  $\beta$ -casein in different salt concentrations; (a) 1 M urea (b) 4 M urea and (c) 8 M urea.



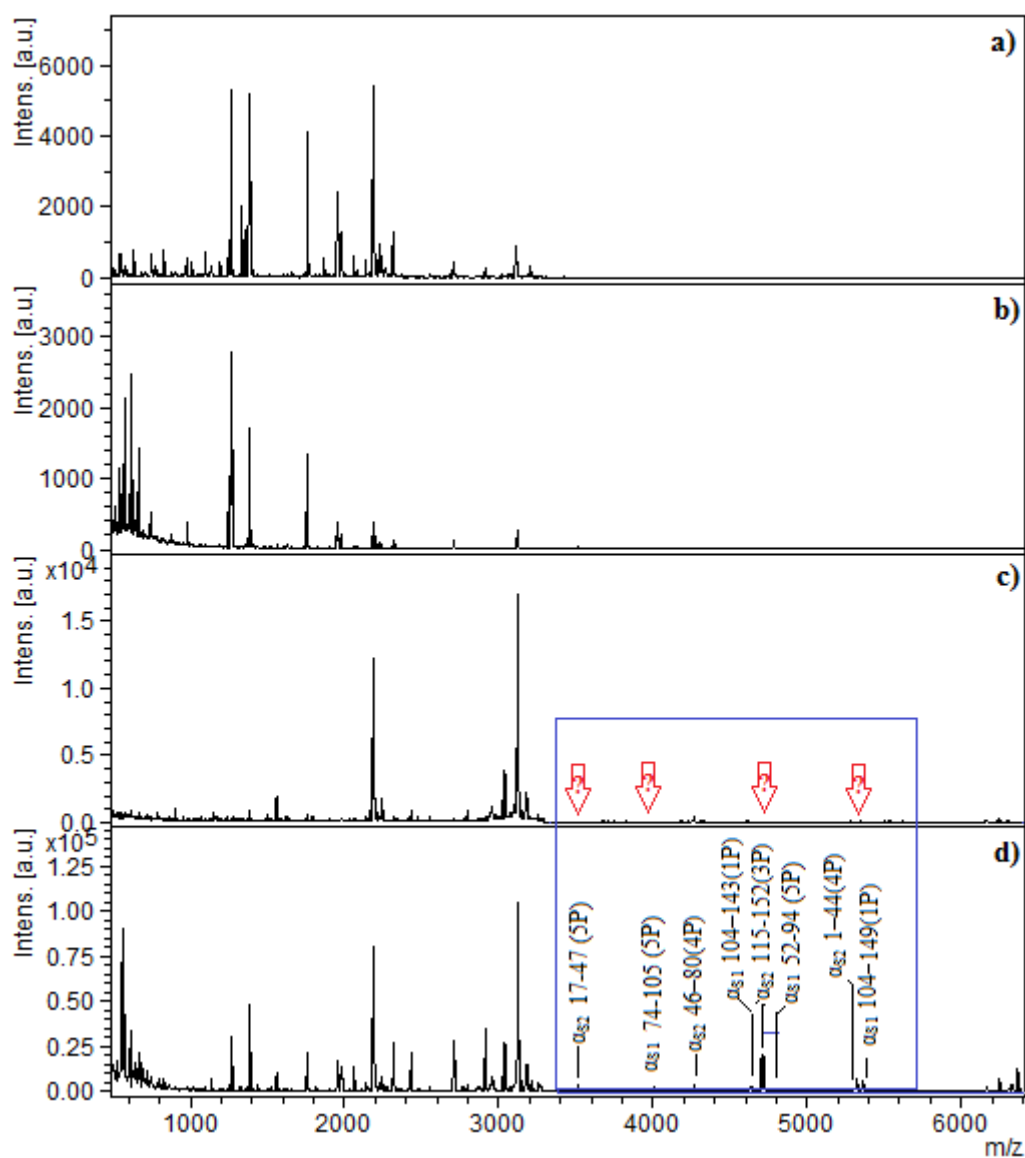

**Figure S14:** MALDI-MS spectra to show comparison of commercial desalting materials in relevance to recovery of hydrophilic species from  $\alpha$ -casein digest after desalting; (a) SDB Tip (GL Sciences), (b) ZipTip C18 (Millipore), (c) Graphite tip (GL Sciences), (d) Cellulose-silica C18.

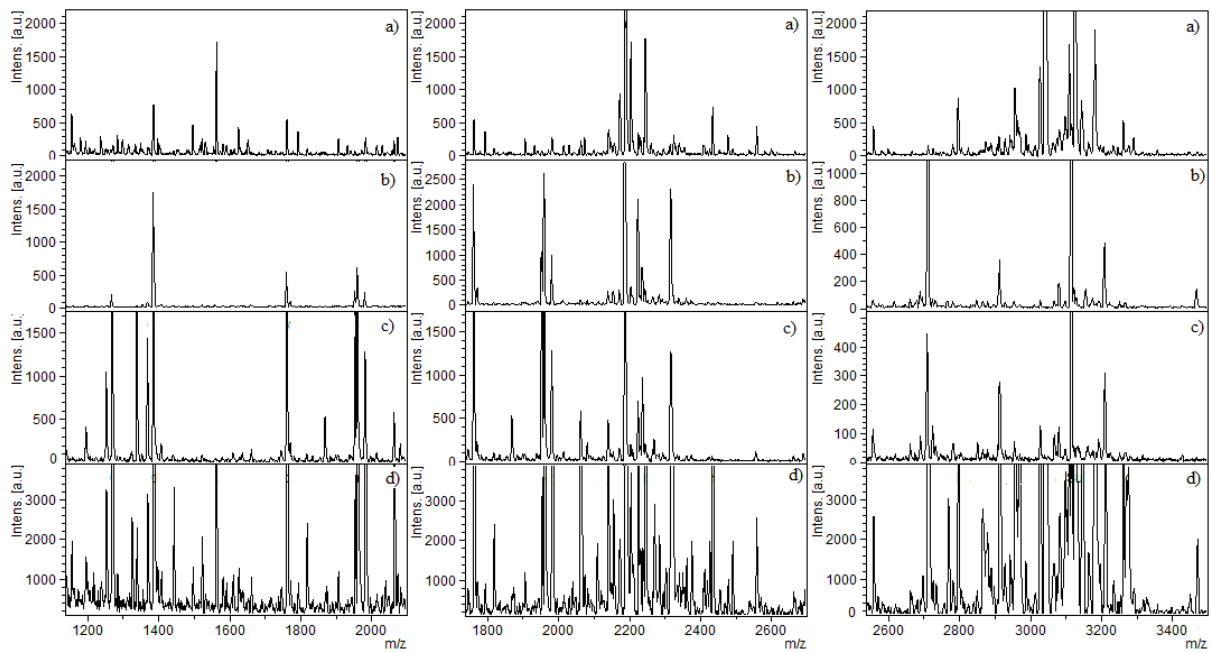

**Figure S15:** Comparison of different desalting tips with cellulose-silica C18 for tryptic milk digest: (a) SDB Tip (styrene-divinyl benzene, GL Sciences); (b) ZipTip C18 (Millipore); (c) Graphite Tip (GL Sciences) and (d) Cellulose-silica C18. The comparison of sequence coverage for milk proteins (casein, lactoferrin and lactoglobulin) is given in Table S2.

**Table S1:** Overview of synthesis and application of composites fabricated using cellulose and silica.

| <b>Composite</b>                                                           | <b>Synthesis</b>                                           | <b>Application</b>                                           | <b>Reference</b> |
|----------------------------------------------------------------------------|------------------------------------------------------------|--------------------------------------------------------------|------------------|
| NH <sub>2</sub> -functionalized CA/silica composite nano-fibrous membranes | Cellulose acetate modified with silane                     | Water treatment                                              | 1                |
| Cellulose-silica composite fibre                                           | cellulose derivatized with silane reagent in ethanol/water | Affect of silica concentration on crystallinity of cellulose | 2                |
| Cellulose–Silica Nanocomposite Aerogels*                                   | Silane reagent is used with cellulose, calcination         | Nano-porous materials synthesis                              | 3                |
| Cellulose/silica hybrid (CSH) composites**                                 | silane reagent for treatment of cellulose                  | Comparison to commercial insulation foams                    | 4                |

\*fabrillar morphology of composite inherited from the cellulose network

\*\*silica network in cellulosic materials increased their dimensional stability, hydrophobicity, thermal stability and bending strength

**Table S2:** Method and material reproducibility of selected independent measurements using cellulose-silica-IMAC-Sm<sup>3+</sup> for serum digest.

|                          | <b>Spectra A</b> | <b>Spectra B</b> | <b>Spectra C</b> | <b>Spectra D</b> | <b>SD</b> |
|--------------------------|------------------|------------------|------------------|------------------|-----------|
| <b>[M+H]<sup>+</sup></b> | 1343.941         | 1343.183         | 1343.183         | 1343.183         | 0.379     |
|                          | 2046.618         | 2046.887         | 2046.887         | 2046.976         | 0.150     |
|                          | 2645.914         | 2645.252         | 2645.252         | 2645.332         | 0.319     |
|                          | 3479.297         | 3479.765         | 3479.765         | 3479.765         | 0.234     |
|                          | 4064.048         | 4064.680         | 4064.680         | 4064.680         | 0.316     |

**Table S3:** Detail of phosphopeptides identified for cellulose-silica IMAC-Sm<sup>3+</sup> from serum digest. Phosphopeptides associated to prostate cancer are highlighted.

| Tree Hierarchy                                                                                        | Meas. Mass | Calc. MH <sup>+</sup> | Int.    | Dev (Da) | M | Sequence                                                                                                                           |
|-------------------------------------------------------------------------------------------------------|------------|-----------------------|---------|----------|---|------------------------------------------------------------------------------------------------------------------------------------|
| <b>39S ribosomal protein L54, mitochondrial OS=Homo sapiens GN=MRPL54 PE=1 SV=1 RM54_HUMAN</b>        |            |                       |         |          |   |                                                                                                                                    |
| peak 17                                                                                               | 1268.42    | 1268.54               | 3777.37 | -0.122   | 0 | TLEELDPEER 1: Phospho (ST)                                                                                                         |
| peak 37                                                                                               | 2661.03    | 2661.09               | 523.408 | -0.06    | 0 | DPDVCTDPVQLTTYAMGVNIYK 14: Phospho (Y) 21: Phospho (Y) 5: Carboxymethyl (C)                                                        |
| <b>Coiled-coil domain-containing protein 124 OS=Homo sapiens GN=CCDC124 PE=1 SV=1 CC124_HUMAN</b>     |            |                       |         |          |   |                                                                                                                                    |
| peak 26                                                                                               | 1953.13    | 1952.92               | 785.957 | 0.212    | 0 | TIEDAIAVLSVAEEAADR 1: Phospho (ST)                                                                                                 |
| <b>Receptor-transporting protein 2 OS=Homo sapiens GN=RTP2 PE=2 SV=1 RTP2_HUMAN</b>                   |            |                       |         |          |   |                                                                                                                                    |
| peak 22                                                                                               | 1495.56    | 1495.58               | 89.741  | -0.025   | 1 | CTSLTTCEWKK 2: Phospho (ST) 1: Carboxymethyl (C) 7: Carboxymethyl (C)                                                              |
| peak 24                                                                                               | 1642.81    | 1642.62               | 2213.66 | 0.185    | 1 | MCTSLTTCEWKK 1: Oxidation (M) 3: Phospho (ST) 2: Carboxymethyl (C) 8: Carboxymethyl (C)                                            |
| <b>Twist-related protein 1 OS=Homo sapiens GN=TWIST1 PE=1 SV=1 TWIST1_HUMAN</b>                       |            |                       |         |          |   |                                                                                                                                    |
| peak 20                                                                                               | 1385.51    | 1385.39               | 3317.65 | 0.117    | 0 | MEGAWSMSASH 1: Oxidation (M) 6: Phospho (ST) 7: Oxidation (M) 8: Phospho (ST)                                                      |
| peak 21                                                                                               | 1407.47    | 1407.51               | 97.862  | -0.04    | 0 | MASCSYVAHER 1: Oxidation (M) 6: Phospho (Y) 4: Carboxymethyl (C)                                                                   |
| peak 43                                                                                               | 3145.08    | 3145.04               | 33.158  | 0.042    | 0 | MMQDVSSSPVSPADDLSLNSEEEEDR 1: Oxidation (M) 6: Phospho (ST) 7: Phospho (ST) 8: Phospho (ST) 11: Phospho (ST)                       |
| peak 44                                                                                               | 3209.47    | 3209.01               | 138.327 | 0.456    | 0 | MMQDVSSSPVSPADDLSLNSEEEEDR 6: Phospho (ST) 7: Phospho (ST) 8: Phospho (ST) 11: Phospho (ST) 16: Phospho (ST)                       |
| <b>cAMP-specific 3',5'-cyclic phosphodiesterase 4C OS=Homo sapiens GN=PDE4C PE=1 SV=2 PDE4C_HUMAN</b> |            |                       |         |          |   |                                                                                                                                    |
| peak 36                                                                                               | 2618.02    | 2618.2                | 2861.58 | -0.179   | 1 | ALDPQSSPGLGRIMQAPVPHSQR 6: Phospho (ST) 7: Phospho (ST) 14: Oxidation (M)                                                          |
| <b>SAP30-binding protein OS=Homo sapiens GN=SAP30BP PE=1 SV=1 S30BP_HUMAN</b>                         |            |                       |         |          |   |                                                                                                                                    |
| peak 47                                                                                               | 4719.2     | 4719.47               | 66.828  | 0.175    | 0 | WDSAIPVTTIAQPTILTTTATLPAVVTVTTSASGSK 3: Phospho (ST) 8: Phospho (ST) 9: Phospho (ST) 14: Phospho (ST) 17: Phospho (ST) 18: Phospho |

|                                                                                                                                    |         |         |         |        |   |                                                                                                                                                   |
|------------------------------------------------------------------------------------------------------------------------------------|---------|---------|---------|--------|---|---------------------------------------------------------------------------------------------------------------------------------------------------|
|                                                                                                                                    |         |         |         |        |   | (ST) 19: Phospho (ST) 21: Phospho (ST) 27: Phospho (ST) 29: Phospho (ST) 30: Phospho (ST) 31: Phospho (ST) 33: Phospho (ST) 35: Phospho (ST)      |
| <b>Zinc finger protein 439 OS=Homo sapiens GN=ZNF439 PE=2 SV=1 ZN439_HUMAN</b>                                                     |         |         |         |        |   |                                                                                                                                                   |
| peak 23                                                                                                                            | 1499.31 | 1499.51 | 144.093 | -0.199 | 1 | SHMGEKAYQCK 1: Phospho (ST) 8: Phospho (Y) 10: Carboxymethyl (C)                                                                                  |
| peak 42                                                                                                                            | 3122.21 | 3122.22 | 1656.36 | -0.012 | 1 | ASPEVKSCDSFVCEVGLGNSSSNMNR 2: Phospho (ST) 7: Phospho (ST) 24: Oxidation (M) 8: Carboxymethyl (C) 13: Carboxymethyl (C)                           |
| <b>Regulator of telomere elongation helicase 1 OS=Homo sapiens GN=RTEL1 PE=1 SV=2 RTEL1_HUMAN</b>                                  |         |         |         |        |   |                                                                                                                                                   |
| peak 34                                                                                                                            | 2365.67 | 2365.95 | 87.348  | -0.289 | 0 | VLSYWCFSPGHSMHELVR 3: Phospho (ST) 4: Phospho (Y) 6: Carboxymethyl (C)                                                                            |
| <b>Leukocyte receptor cluster member 8 OS=Homo sapiens GN=LENG8 PE=1 SV=2 LENG8_HUMAN</b>                                          |         |         |         |        |   |                                                                                                                                                   |
| peak 33                                                                                                                            | 2323.6  | 2323.83 | 79.42   | -0.236 | 1 | NSGDITTELAYLTRELK 2: Phospho (ST) 6: Phospho (ST) 7: Phospho (ST) 11: Phospho (Y) 13: Phospho (ST)                                                |
| <b>Synaptonemal complex central element protein 3 OS=Homo sapiens GN=SYCE3 PE=3 SV=1 SYCE3_HUMAN</b>                               |         |         |         |        |   |                                                                                                                                                   |
| peak 27                                                                                                                            | 1960.18 | 1959.91 | 76.499  | 0.265  | 1 | EEMEKNWQELLHETK 3: Oxidation (M)                                                                                                                  |
| <b>Mitochondrial brown fat uncoupling protein 1 OS=Homo sapiens GN=UCP1 PE=1 SV=3 UCP1_HUMAN</b>                                   |         |         |         |        |   |                                                                                                                                                   |
| peak 18                                                                                                                            | 1310.19 | 1310.32 | 204.061 | -0.129 | 1 | SRQTMDCAT 1: Phospho (ST) 4: Phospho (ST) 9: Phospho (ST) 7: Carboxymethyl (C)                                                                    |
| peak 45                                                                                                                            | 3806.25 | 3806.56 | 68.099  | -0.315 | 0 | NNILADDVPCHLVSALIAGFCATAMSSPVDVVK 14: Phospho (ST) 23: Phospho (ST) 26: Phospho (ST) 27: Phospho (ST) 10: Carboxymethyl (C) 21: Carboxymethyl (C) |
| <b>Butyrophilin subfamily 1 member A1 OS=Homo sapiens GN=BTN1A1 PE=1 SV=3 BT1A1_HUMAN</b>                                          |         |         |         |        |   |                                                                                                                                                   |
| peak 46                                                                                                                            | 4218.63 | 4218.25 | 14.566  | 0.382  | 1 | LTPWIVAVAVILMVLGLLTIGSIFFTWRLYNERPR 2: Phospho (ST) 30: Phospho (Y)                                                                               |
| <b>Aminopeptidase N OS=Homo sapiens GN=ANPEP PE=1 SV=4 AMPN_HUMAN</b>                                                              |         |         |         |        |   |                                                                                                                                                   |
| peak 29                                                                                                                            | 2082.29 | 2082    | 65.92   | 0.293  | 1 | GASVLRMLSSFLSEDVFK 3: Phospho (ST) 7: Oxidation (M)                                                                                               |
| peak 39                                                                                                                            | 3037.43 | 3037.3  | 294.364 | 0.122  | 0 | NANSSPVASTTPSASATTNPASATTLQSK 4: Phospho (ST) 5: Phospho (ST)                                                                                     |
| <b>[Pyruvate dehydrogenase (acetyl-transferring)] kinase isozyme 1, mitochondrial OS=Homo sapiens GN=PDK1 PE=1 SV=1 PDK1_HUMAN</b> |         |         |         |        |   |                                                                                                                                                   |
| peak 27                                                                                                                            | 1960.18 | 1960.36 | 76.499  | -0.18  | 0 | SFSSDSGSSPASER 1: Phospho (ST) 3: Phospho (ST) 4: Phospho (ST) 6: Phospho (ST) 8: Phospho (ST) 9: Phospho (ST) 12: Phospho (ST)                   |
| peak 35                                                                                                                            | 2603.56 | 2603.92 | 52.543  | -0.36  | 1 | LFNYMYSTAPRPRVETSR 4: Phospho (Y) 5: Oxidation (M) 6: Phospho                                                                                     |

|                                                                                           |         |         |         |         |   |                                                                                                                                                 |
|-------------------------------------------------------------------------------------------|---------|---------|---------|---------|---|-------------------------------------------------------------------------------------------------------------------------------------------------|
|                                                                                           |         |         |         |         |   | (Y) 7: Phospho (ST) 8: Phospho (ST) 16: Phospho (ST)                                                                                            |
| <b>Complement C1q subcomponent subunit A OS=Homo sapiens GN=C1QA PE=1 SV=2 C1QA_HUMAN</b> |         |         |         |         |   |                                                                                                                                                 |
| peak 26                                                                                   | 1953.13 | 1952.94 | 785.957 | 0.194   | 1 | VGYPGPGSGLGARGIPGIK 3: Phospho (Y) 7: Phospho (ST)                                                                                              |
| peak 41                                                                                   | 3107.72 | 3107.41 | 37.211  | 0.316   | 1 | EGPRGWLVLVLAISLASMVTEDLCR 15: Phospho (ST) 18: Phospho (ST) 10: Carboxymethyl (C) 25: Carboxymethyl (C)                                         |
| <b>Zinc finger protein 726 OS=Homo sapiens GN=ZNF726 PE=2 SV=3 ZN726_HUMAN</b>            |         |         |         |         |   |                                                                                                                                                 |
| peak 25                                                                                   | 1760.99 | 1760.72 | 260.125 | 0.263   | 1 | NLYRNVMLENYR 3: Phospho (Y) 7: Oxidation (M) 11: Phospho (Y)                                                                                    |
| peak 36                                                                                   | 2618.02 | 2618.2  | 2861.58 | -0.188  | 1 | AFNQSSNYTTHKVTHTGKPYK 8: Phospho (Y)                                                                                                            |
| <b>Homeobox protein Hox-C10 OS=Homo sapiens GN=HOXC10 PE=1 SV=2 HXC10_HUMAN</b>           |         |         |         |         |   |                                                                                                                                                 |
| peak 40                                                                                   | 3042.96 | 3043.1  | 33.664  | -0.138  | 1 | AAYRLEQPVGRLSSCSYPPSVK 3: Phospho (Y) 14: Phospho (ST) 15: Phospho (ST) 17: Phospho (ST) 18: Phospho (Y) 21: Phospho (ST) 16: Carboxymethyl (C) |
| <b>Putative uncharacterized protein FLJ45831 OS=Homo sapiens PE=5 SV=1 YQ050_HUMAN</b>    |         |         |         |         |   |                                                                                                                                                 |
| peak 19                                                                                   | 1336.34 | 1336.37 | 114.268 | -0.023  | 0 | EHSSGVSSVK 3: Phospho (ST) 4: Phospho (ST) 7: Phospho (ST) 8: Phospho (ST)                                                                      |
| peak 32                                                                                   | 2317.48 | 2317.23 | 66.872  | 0.246   | 1 | GVDNSKISVLILLGCELEQTK 15: Carboxymethyl (C)                                                                                                     |
| <b>Protein phosphatase 1 regulatory subunit 3D OS=Homo sapiens GN=PPP1R3D PE=1 SV=1</b>   |         |         |         |         |   |                                                                                                                                                 |
| peak 28                                                                                   | 1992.33 | 1991.32 | 1991.74 | -0.4152 | 1 | MSRGPSSAVLPSALGSRK: 4 Phospho (ST)                                                                                                              |
| peak 11                                                                                   | 1077.14 | 1076.13 | 1075.36 | 0.7772  | 0 | RYTFSGWRS: 2 Phospho (ST)                                                                                                                       |
| peak 14                                                                                   | 1157.22 | 1156.22 | 1155.32 | 0.8928  | 0 | RYTFSGWRS: Phospho (Y); 2 Phospho (ST)                                                                                                          |
| peak 5                                                                                    | 995.161 | 994.154 | 993.363 | 0.791   | 0 | RDYSLTCRN: Phospho (ST)                                                                                                                         |
| <b>Protein FAM3D OS=Homo sapiens GN=FAM3D PE=1 SV=1</b>                                   |         |         |         |         |   |                                                                                                                                                 |
| peak 8                                                                                    | 1013.14 | 1012.14 | 1012.49 | -0.3522 | 1 | MRVSGVLRRL: Oxidation (M); Phospho (ST)                                                                                                         |
| peak 12                                                                                   | 1077.14 | 1076.13 | 1075.38 | 0.7582  | 0 | R.SYMSFSMKT: Oxidation (M); Phospho (Y)                                                                                                         |
| peak 16                                                                                   | 1253.33 | 1252.32 | 1251.3  | 1.0156  | 0 | R.SYMSFSMKT: 2 Oxidation (M); 2 Phospho (ST); Phospho (Y)                                                                                       |
| peak 30                                                                                   | 2236.51 | 2235.5  | 2235.97 | -0.4634 | 1 | KYKCGLIKPCPANYFAFKI: 2 Phospho (Y)                                                                                                              |
| peak 4                                                                                    | 885.069 | 884.062 | 884.39  | -0.3284 | 0 | R.MIMSPVKN: Phospho (ST)                                                                                                                        |
| peak 38                                                                                   | 2953.57 | 2952.56 | 2953.13 | -0.5709 | 1 | KEIPGGALVLVASYDDPGTKMNDESRLK: 3 Phospho (ST); Phospho (Y)                                                                                       |

| <b>Fibrinogen gamma chain OS=Homo sapiens GN=FGG PE=1 SV=3</b>            |         |         |         |         |   |                                                    |
|---------------------------------------------------------------------------|---------|---------|---------|---------|---|----------------------------------------------------|
| peak 9                                                                    | 2313.56 | 2312.55 | 2311.98 | 0.5667  | 1 | RVELEDWNGRTSTADYAMFKV: Phospho (Y)                 |
| peak 31                                                                   | 1019.12 | 1018.11 | 1017.34 | 0.7715  | 1 | RWYSMKKT: Oxidation (M); Phospho (ST); Phospho (Y) |
| <b>Angiopietin-related protein 3 OS=Homo sapiens GN=ANGPTL3 PE=1 SV=1</b> |         |         |         |         |   |                                                    |
| peak 15                                                                   | 1195.11 | 1194.1  | 1194.44 | -0.3345 | 0 | KNMSLELNSKL : 2 Phospho (ST)                       |
| peak 2                                                                    | 881.187 | 880.18  | 881.37  | -1.1903 | 0 | KIYSIVKQ: Phospho (ST); Phospho (Y)                |
| peak 13                                                                   | 1099.18 | 1098.17 | 1098.48 | -0.3086 | 1 | RLYSIKSTKM: Phospho (ST); Phospho (Y)              |
| <b>Zinc finger protein 474 OS=Homo sapiens GN=ZNF474 PE=2 SV=1</b>        |         |         |         |         |   |                                                    |
| peak 1                                                                    | 880.133 | 879.126 | 879.314 | -0.1883 | 1 | KTDTQKKR: 2 Phospho (ST)                           |
| peak 6                                                                    | 980.079 | 979.072 | 980.233 | -1.1613 | 0 | KEYTNSKQ: 2 Phospho (ST); Phospho (Y)              |
| <b>Synaptonemal complex protein 3 OS=Homo sapiens GN=SYCP3 PE=1 SV=1</b>  |         |         |         |         |   |                                                    |
| peak 10                                                                   | 1036.08 | 1035.07 | 1035.45 | -0.3723 | 1 | KRLEMYTKA: Oxidation (M); Phospho (Y)              |



**Table S4:** Comparison of sequence coverage for milk tryptic digest containing peptides from casein ( $\alpha$ -casein,  $\beta$ -casein and  $\kappa$ -casein), lactoglobulin and lactoferrin on GL SDB tip, graphite spin column (GL sciences), ZipTip C18 (Millipore) and cellulose-silica C18.

| Milk Protein  | Variants with Swiss Prot Accession No. | Sequence Coverage     |                        |                        |                      |
|---------------|----------------------------------------|-----------------------|------------------------|------------------------|----------------------|
|               |                                        | SDB tip (GL Sciences) | ZipTip C18 (Millipore) | Graphite (GL Sciences) | Cellulose-silica C18 |
| Casein        | $\alpha$                               | 16.0%                 | 18.0%                  | 25.8%                  | 34.8%                |
|               | $\beta$                                | 18.7%                 | 12.98%                 | 30.2%                  | 58.4%                |
|               | $\kappa$                               | 12.3%                 | 27.4%                  | 20.7%                  | 32.9%                |
| Lactoglobulin | $\alpha$ (P00711)                      | 23.7%                 | 34.4%                  | 43.2%                  | 64.9%                |
|               | $\beta$ (P02754)                       | 20.2%                 | 28.9%                  | 33.5%                  | 72.9%                |
| Lactoferrin   |                                        | 19.1%                 | 17.3%                  | 36.4%                  | 54.8%                |

## References

- 1 A. A. Taha, Y. Wu, H. Wang and F. Li, *J. Environ. Manage.*, 2012, **112**, 10-16.
- 2 N. Jia, S. M. Li, M. G. Ma, J. F. Zhu and R. C. Sun, *BioResources*, 2011, **6**, 1186-1195.
- 3 J. Cai, S. Liu, J. Feng, S. Kimura, M. Wada, S. Kuga and L. Zhang, *Angew. Chem. Int. Ed.*, 2012, **51**, 2076-2079.
- 4 S. Sequeira, D. V. Evtugin and I. Portugal, *Polym. Composite*, 2009, **30**, 1275-1282.
